# Supplementary material for: In the final chapters of a nursing career: Understanding pre-retirement experiences of nurses in South Korea
Source: Research Square preprint supplement (doi:10.21203/rs.3.rs-7341728/v1), 2025-08-28
Supplement: Supplementary file 1 [file 831b6090d18bd5e8a455d859.docx]

**Supplementary 1 Consolidated criteria for reporting qualitative studies (COREQ): 32-item checklist**

| **No Item** | **Guide questions/description** |
| --- | --- |
| **Domain 1: Research team and reflexivity** | |
| Personal Characteristics | |
| 1. Interviewer/facilitator | The interviews were conducted by the first author. |
| 2. Credentials | Completion of the doctoral program in nursing, specialized training in qualitative research. |
| 3. Occupation | Researcher specializing in studies within the nursing field. |
| 4. Gender | Female. |
| 5. Experience and training | The interviewer is a trained researcher with specialized training in qualitative research methods, holding a master's degree in nursing. |
| 6. Relationship established | Prior to data collection, the researcher contacted potential participants to explain the purpose and procedures of the study, and engaged in informal conversation to build trust. All of participants met the researcher for the first time during the pre-interview meeting. Before starting the interviews, the researcher sought to establish rapport by actively listening and using open-ended questions, ensuring that participants felt comfortable sharing their experiences. |
| 7. Participant knowledge of the interviewer | Participants had no prior relationship with the interviewer, ensuring objectivity and minimizing potential biases. |
| 8. Interviewer characteristics | The interviewer worked as a nurse at a general hospital for 25 years before retiring five years ago and now teaches at a nursing college. This background allowed the interviewer to maintain a neutral stance while also providing a nuanced approach to the participants' experiences. |
| **Domain 2: Study design** | |
| Theoretical framework | |
| 9. Methodological orientation and Theory  Participant selection | Qualitative exploratory design with thematic analysis approach.  Snowball sampling, from geneal hospitals in Changwon, South Korea. |
| 10. Sampling | Snowball sampling. |
| 11. Method of approach | Initial contact through hospital nursing department, followed by snowball sampling. |
| 12. Sample size | 10 participants |
| 13. Non-participation  Setting | No significant non-participation reported. |
| 14. Setting of data collection | Geneal hospitals in Changwon, South Korea.. |
| 15.Presence of non-participants | No one else was present except the participants and the researchers. |
| 16. Description of sample | The data collection between July to August 2024. 10 nurses participated in this study. Their ages ranged from 56 to 60 years and they had worked for 32 to 38 year. |
| 17. Interview guide | The interview questions were prepared and reviewed by the researcher based on Krueger and Casey’s categories (i.e., opening, introduction, transition, core, and conclusion questions) and the relevant literature. |
| 18. Repeat interviews | No repeat interviews were conducted. |
| 19. Audio/visual recording | We used audio for data collection. |
| 20. Field notes | We took field notes during the interview. |
| 21. Duration | 50 to 90 minutes |
| 22. Data saturation | Yes. |
| 23. Transcripts returned | Yes. |
| **Domain 3: Analysis and findings** | |
| Data analysis | |
| 24. Number of data coders | Two researchers. |
| 25. Description of the coding tree | The coding tree was developed through thematic analysis, with initial codes grouped into broader themes. These themes were refined and validated through iterative discussions among the research team. |
| 26. Derivation of themes | Initial codes were grouped into broader themes, which were refined and validated through team discussions and member checking. |
| 27. Software | No using software for qualitative data |
| 28. Participant checking | Return to the participants for checking. |
| 29. Quotations presented | Relevant participant quotes were selected to illustrate key themes and findings, ensuring they accurately reflect the participants' experiences and perspectives. |
| 30. Data and findings consistent | The findings are consistent with the data, supported by thematic analysis and validated through member checking. |
| 31. Clarity of major themes | The findings clearly presented the major themes. |
| 32. Clarity of minor themes | No minor themes. |
