# Supplementary material for: In the final chapters of a nursing career: Understanding pre-retirement experiences of nurses in South Korea
Source: Research Square preprint supplement (doi:10.21203/rs.3.rs-7341728/v1), 2025-08-28
Supplement: Supplementary file 2 [file bef3057241448e4f3dba9102.docx]

**Supplementary 2. Detailed interview questions**

| Categories | Questions |
| --- | --- |
| Opening | 1. Thank you for participating in this interview. Could you briefly introduce yourself (without your name) and share your current department and years of nursing experience? |
| Introduction | 1. When you hear the word 'retirement,' what is the first thought or image that comes to your mind? |
| Transition | 1. Have you ever thought about retirement during your nursing career? If yes, when was that? 2. You are now within five years of retirement. How do you feel about that?” |
| Core | 1. How are you preparing for life as you approach retirement? 2. What do you think about retirement? 3. How do you feel about retirement? 4. What kind of life would you like to lead after retirement? 5. What challenges or obstacles have you faced in preparing for retirement? 6. In your opinion, what is the most important aspect of preparing for retirement? 7. What kind of support related to retirement have you received from your workplace, colleagues, or family? |
| Conclusion | 1. Is there anything you wanted to say but haven’t, or anything else you’d like to share about retirement? |
